# Supplementary material for: Etching of unmodified Au@Ag nanorods: a tunable colorimetric visualization for the rapid and high selective detection of Hg2+
Source: Royal Society of Chemistry journal article supplement (doi:10.1039/c5ra19627b), 2015-01-01
Supplement: c5ra19627b1.pdf [file c5ra19627b1.pdf]

## Supporting informations for

### **Etching of unmodified Au@Ag nanorods: a tunable colorimetric visualization for rapid and high selective detection of Hg<sup>2+</sup>**

Rong Yang<sup>†</sup>, Dan Song<sup>†</sup>, Chongwen Wang<sup>‡</sup>, Anna Zhu<sup>†</sup>, Rui Xiao<sup>‡</sup>, Jingquan Liu<sup>†</sup>,  
Feng Long<sup>†\*</sup>

<sup>†</sup>School of Environment and Natural Resources, Renmin University of China, 100872, Beijing,

<sup>‡</sup>Beijing Institute of Radiation Medicine, Beijing 100850, China

\*Corresponding Author: longf04@mails.thu.edu.cn

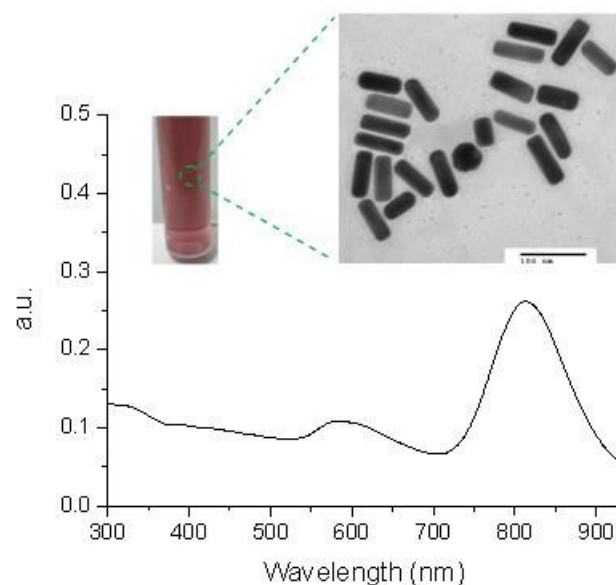

Figure S1. The adsorption spectrum of Au nanorods. Insets: the photo of Au nanorods colloid and TEM images of Au nanorods.

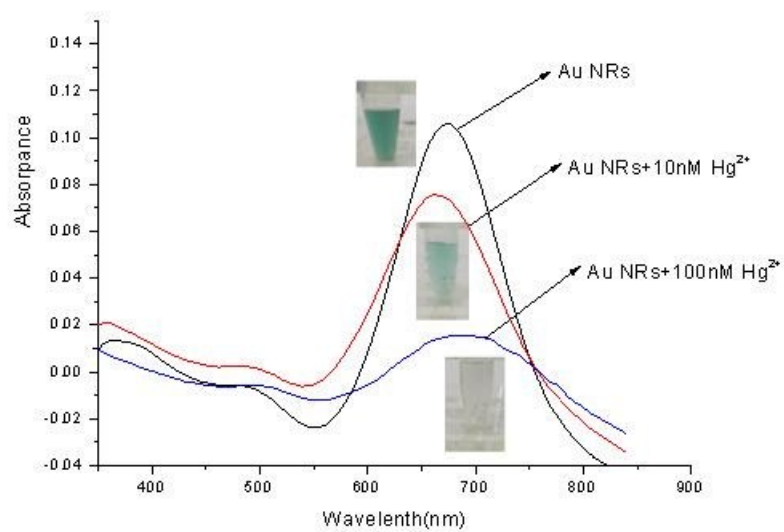

Figure S2. The adsorption spectra of Au@Ag NRs with moderate Ag nanoshell upon the addition of different concentration of  $Hg^{2+}$ . The insets: The color of Au@Ag NRs with moderate Ag nanoshell and different concentration of  $Hg^{2+}$

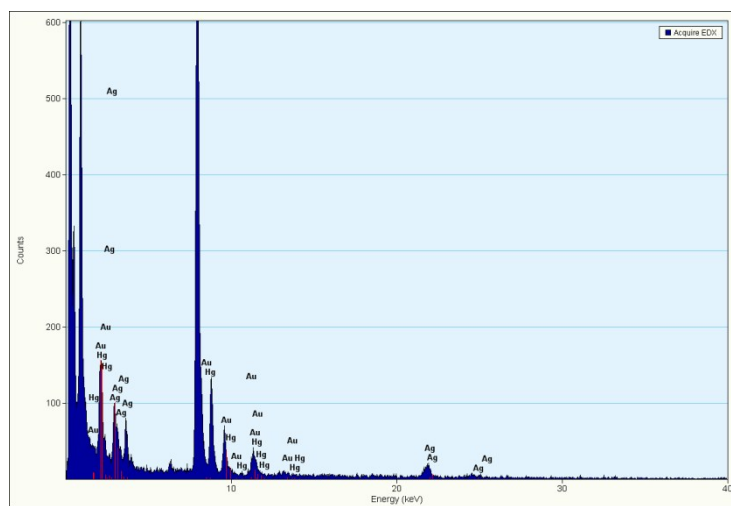

(a)

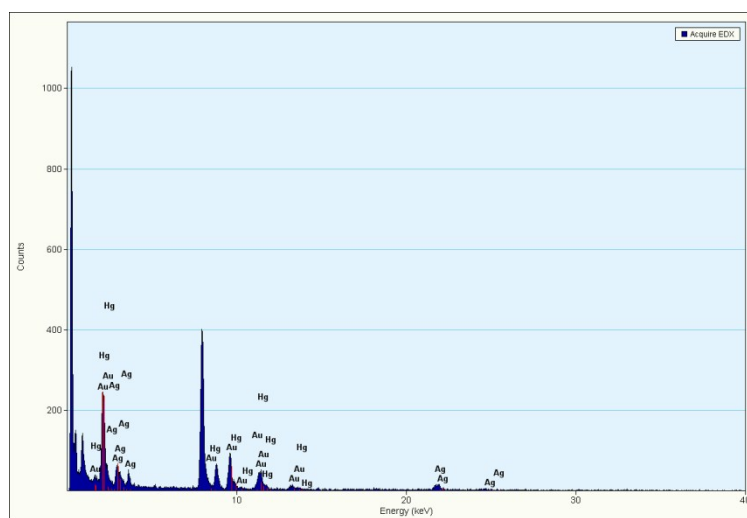

(b)

Figure S3. (a) and (b) were the EDS elemental analyses of Au@Ag NRs after addition of  $\text{Hg}^{2+}$  of low concentration (1  $\mu\text{M}$ ) and high concentration (30  $\mu\text{M}$ ), respectively.

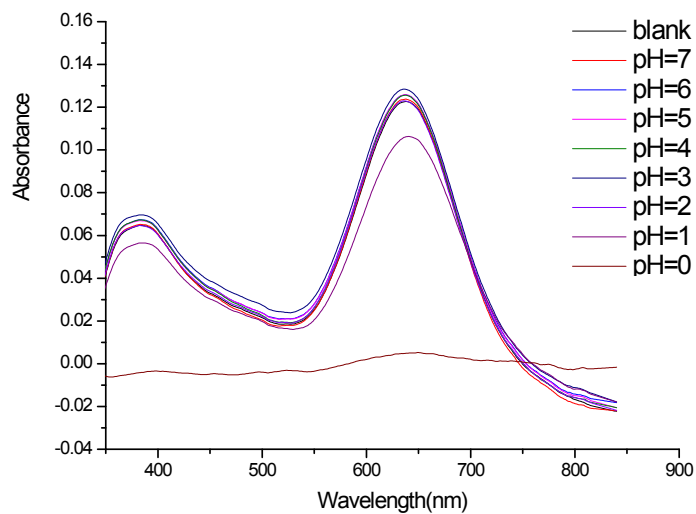

Figure S4 The effect of pH on the absorption spectra of the Au@Ag NRs

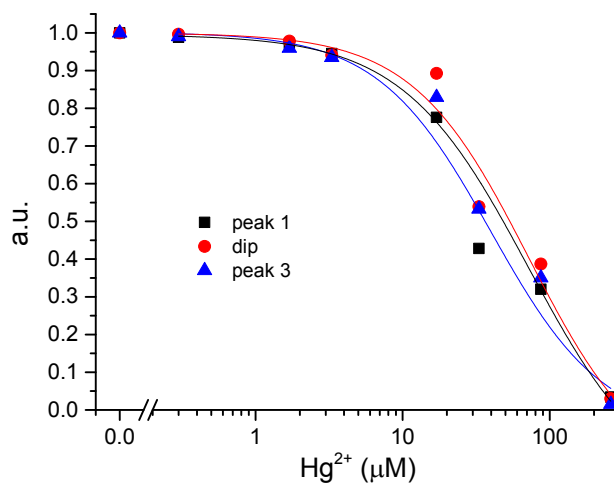

Figure S5. The absorbance intensity of 412 nm, dip and 580 nm was related with  $\text{Hg}^{2+}$  concentration ranging from 0 to 267  $\mu\text{M}$ .
